# Supplementary material for: Mutational landscape in genetically engineered, carcinogen-induced, and radiation-induced mouse sarcoma
Source: JCI journal article supplement (doi:10.1172/jci.insight.128698), 2019-05-21
Supplement: sd1 [file 1]

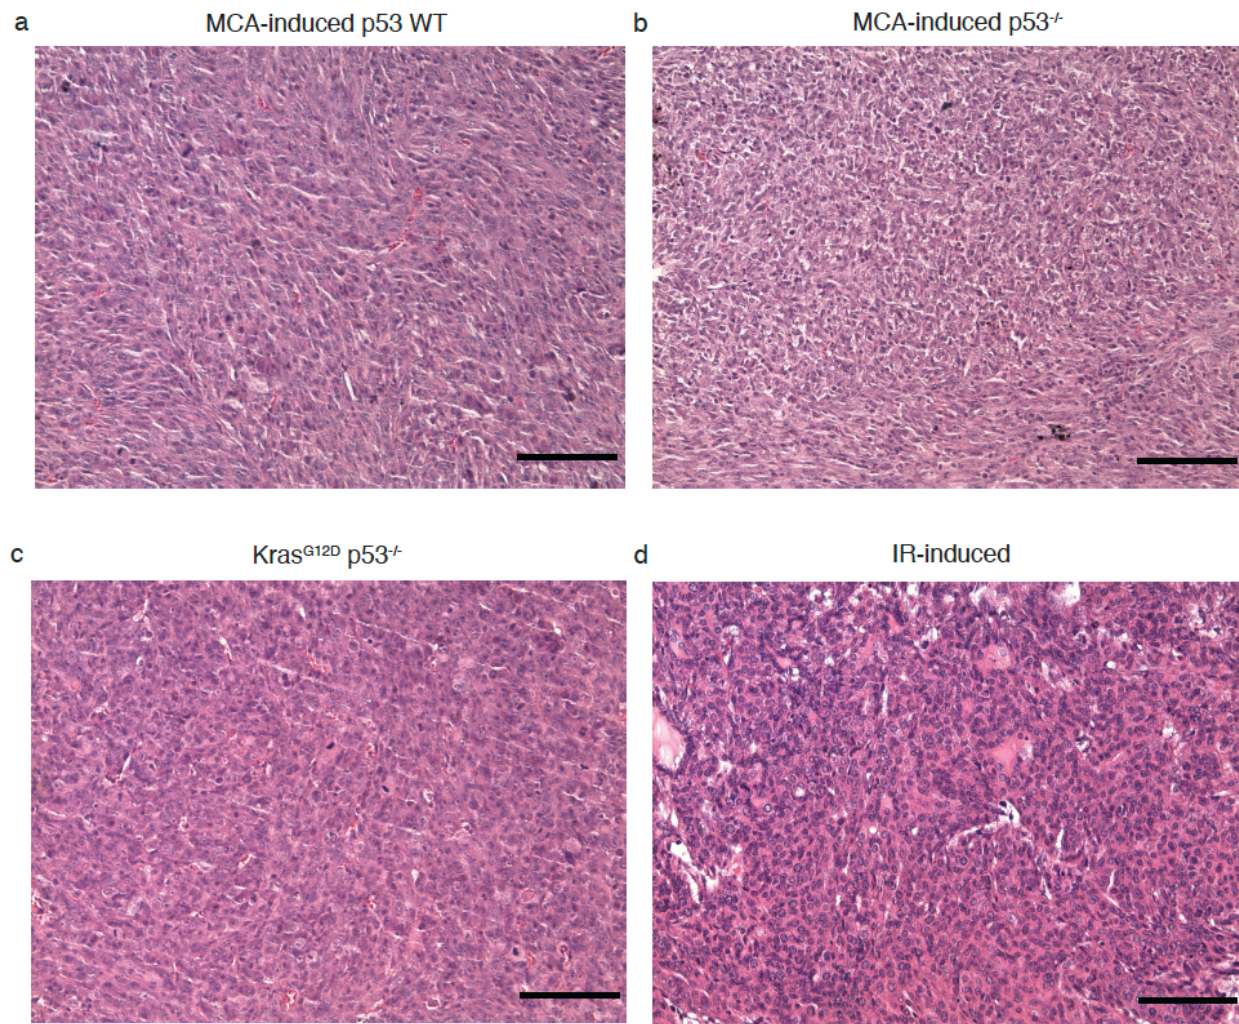

**Figure S1.** Representative hematoxylin and eosin (H&E) stained sections of murine soft-tissue sarcomas. **a**, MCA-induced p53 WT. **b**, MCA-induced p53<sup>-/-</sup>. **c**, Kras<sup>G12D</sup>; p53<sup>-/-</sup>. **d**, IR-induced p53 WT. Scale bar, 100  $\mu\text{m}$ .

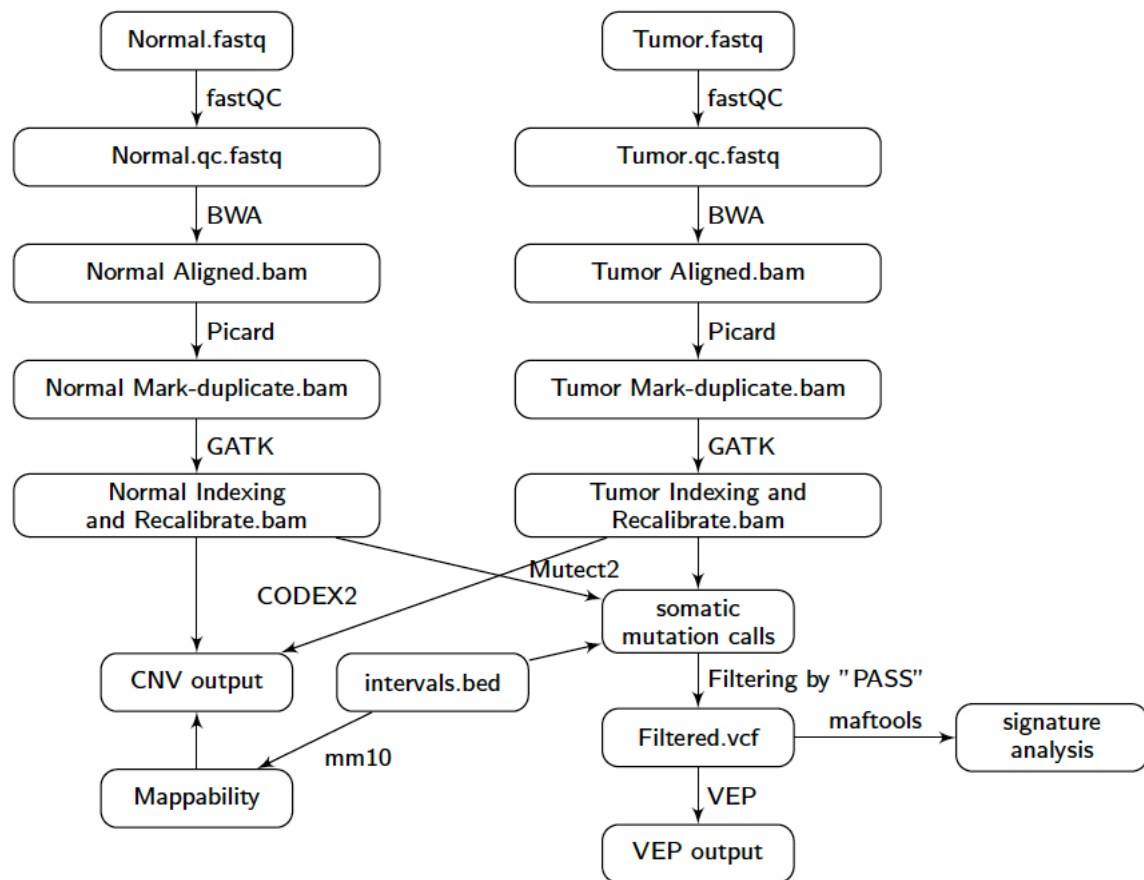

**Figure S2.** Schematics of the methods for processing and analyzing whole exome sequencing data from tumors and paired normal tissues.

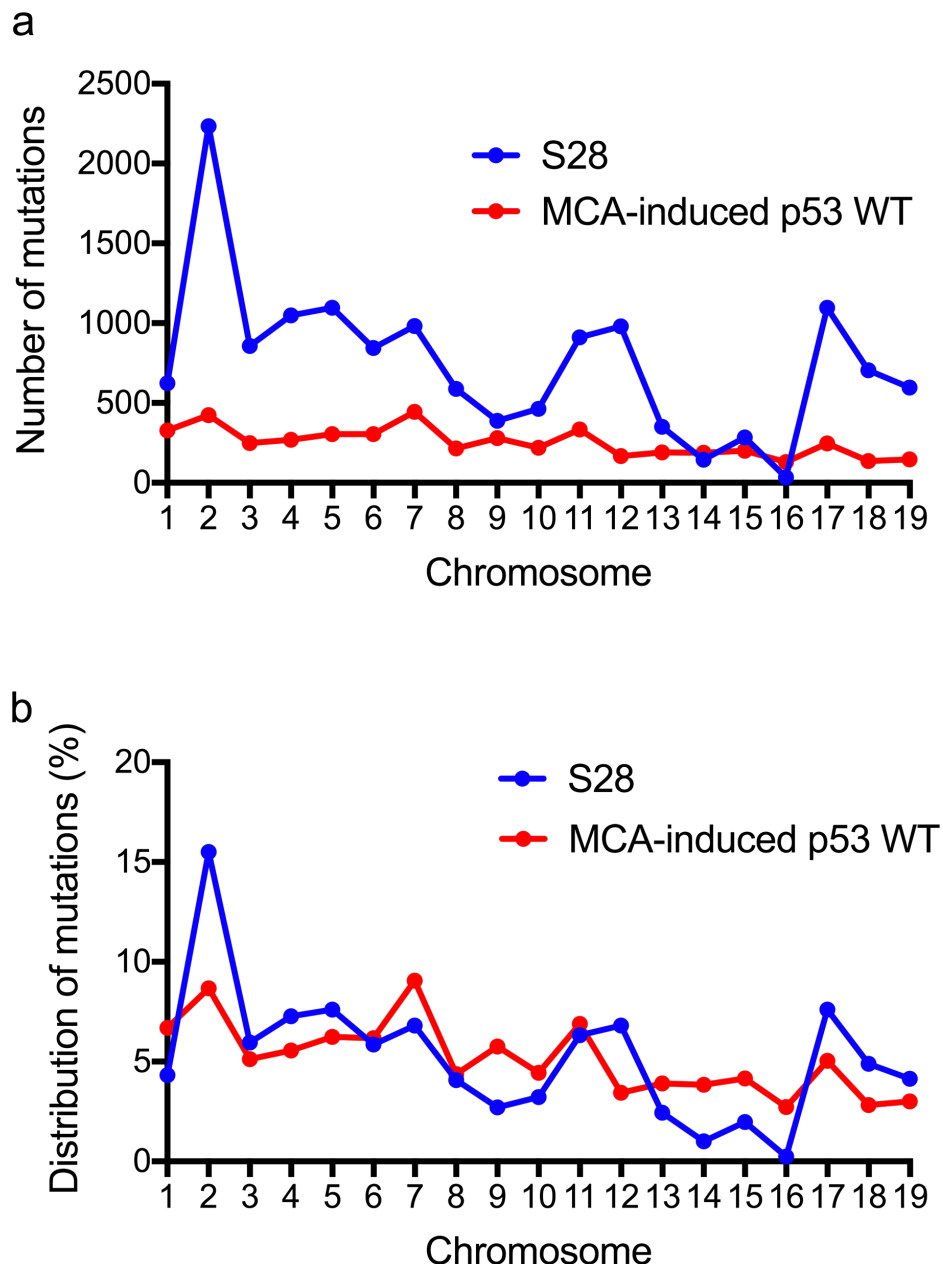

**Figure S3.** Comparison of mutations per chromosome between an IR-induced sarcoma (S28) and MCA-induced p53 WT sarcomas. **a,b**, The number of total somatic mutations and the distribution of total somatic mutations on each chromosome. The data of MCA-induced p53 WT sarcomas represent the average of 7 tumors.

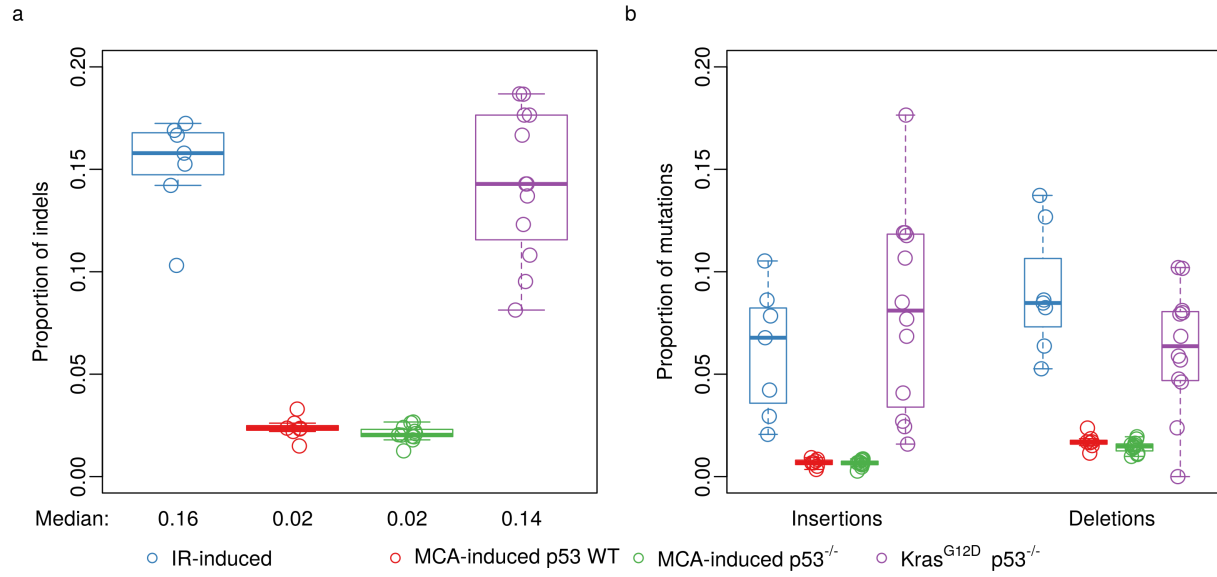

**Figure S4.** The distribution of sequence variants within total (synonymous and nonsynonymous) somatic mutations. **a**, The proportion of insertion-deletions (indels) within total mutations. **b**, The proportion of insertions or deletions within total mutations.

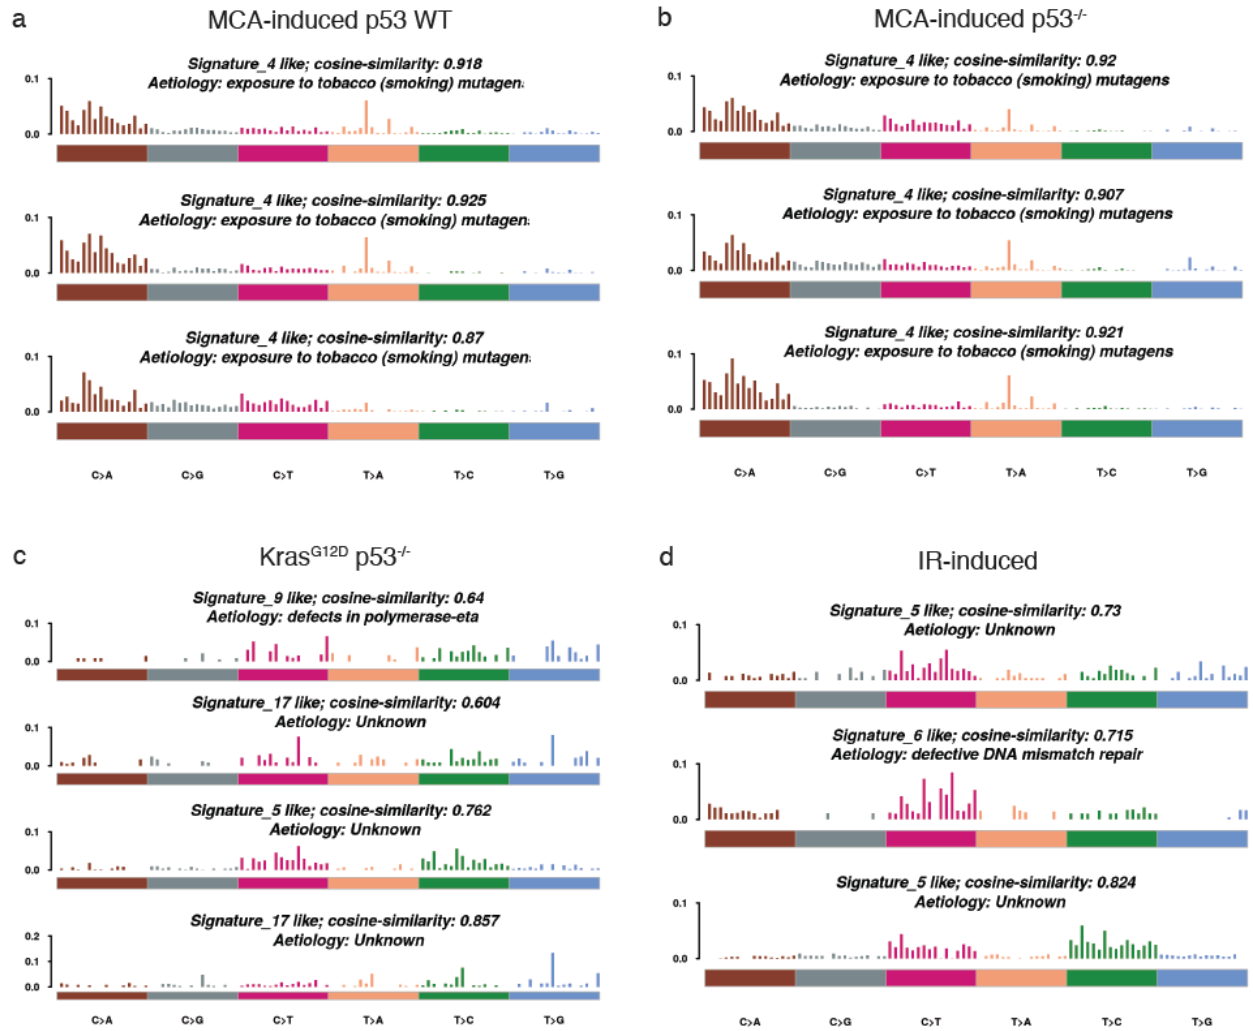

**Figure S5.** Mutational signature analysis of murine soft-tissue sarcomas. Mutational signatures of each sarcoma genotype were generated using nonnegative matrix factorization (NMF) trinucleotide-based analysis. From each sarcoma genotype, either 3 or 4 individual signatures were generated. Each murine sarcoma signature was compared to COSMIC mutational signatures of human cancers to identify the COSMIC signature with the highest cosine-similarity score.

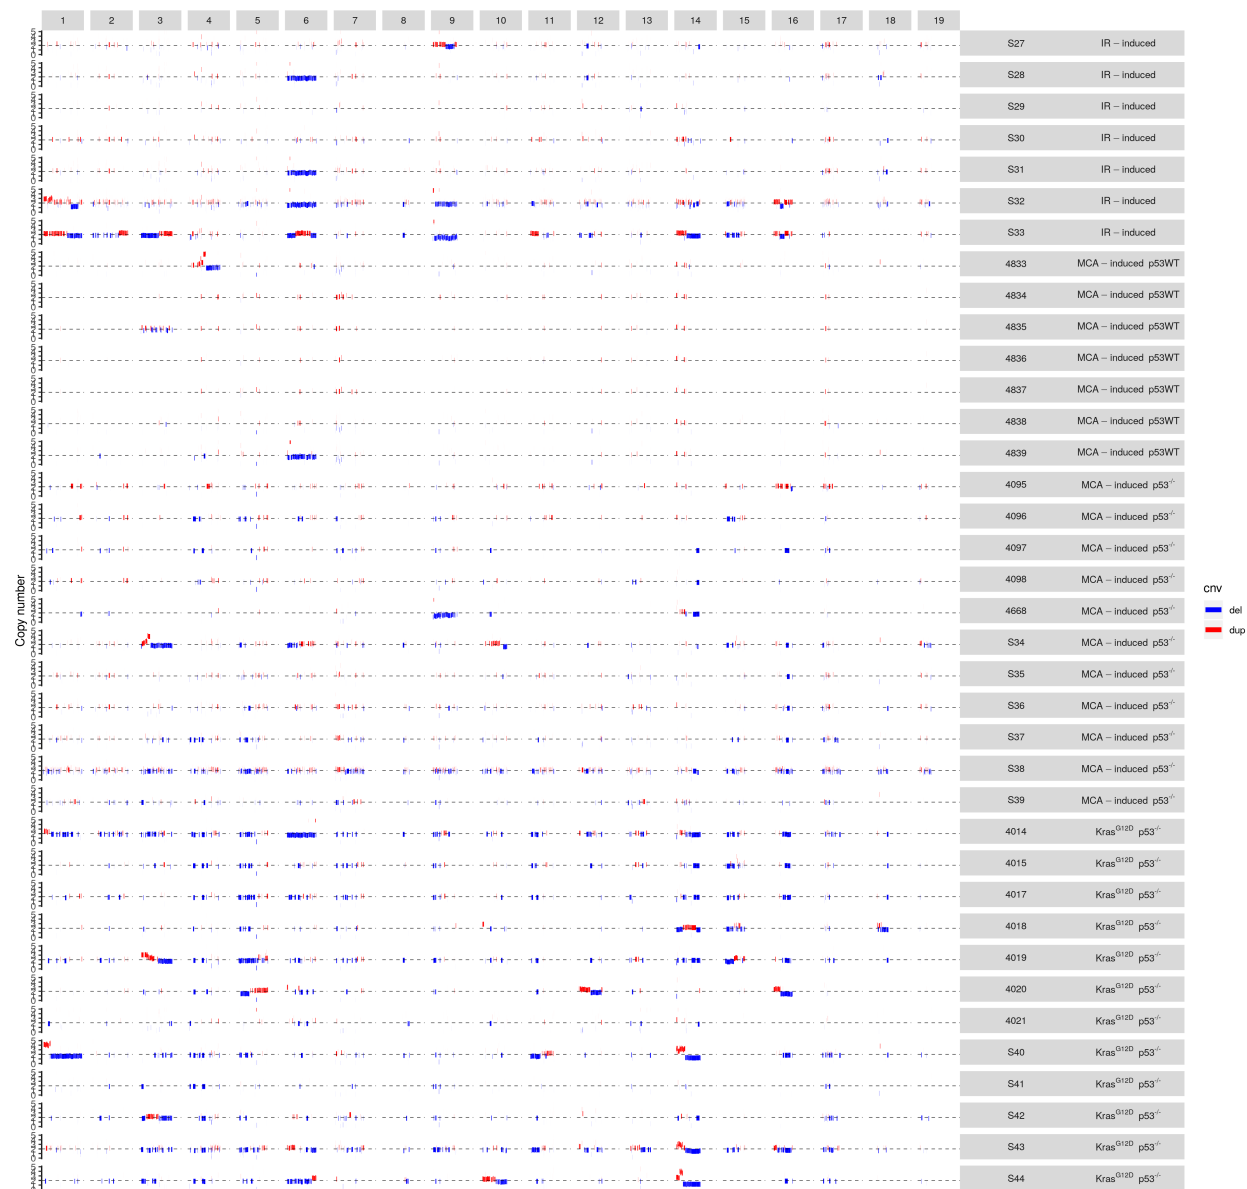

**Figure S6.** Schematics of copy number variations across 19 chromosomes of individual sarcoma samples.

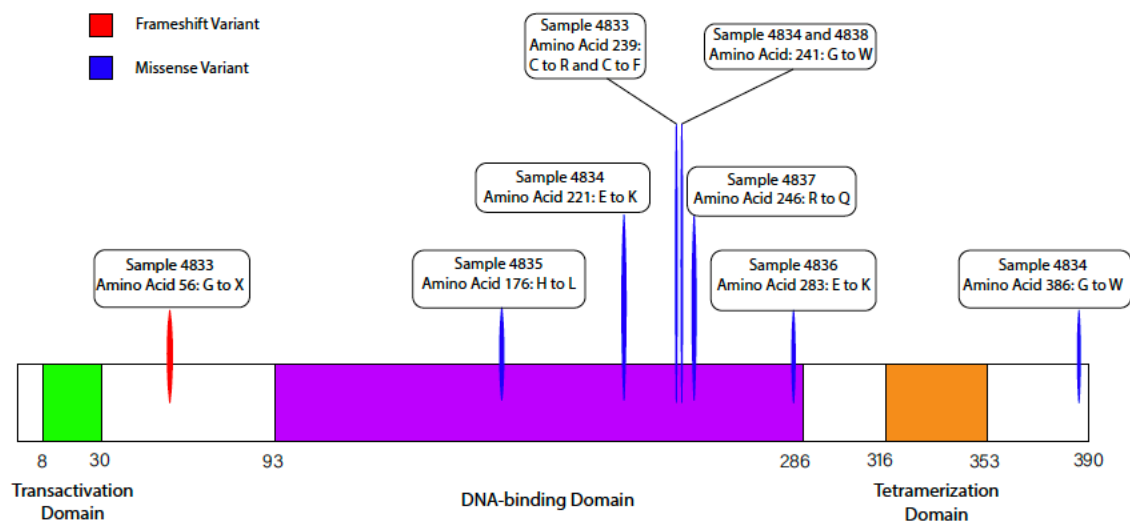

**Figure S7.** Schematics of nonsynonymous mutations in the tumor suppressor gene p53.

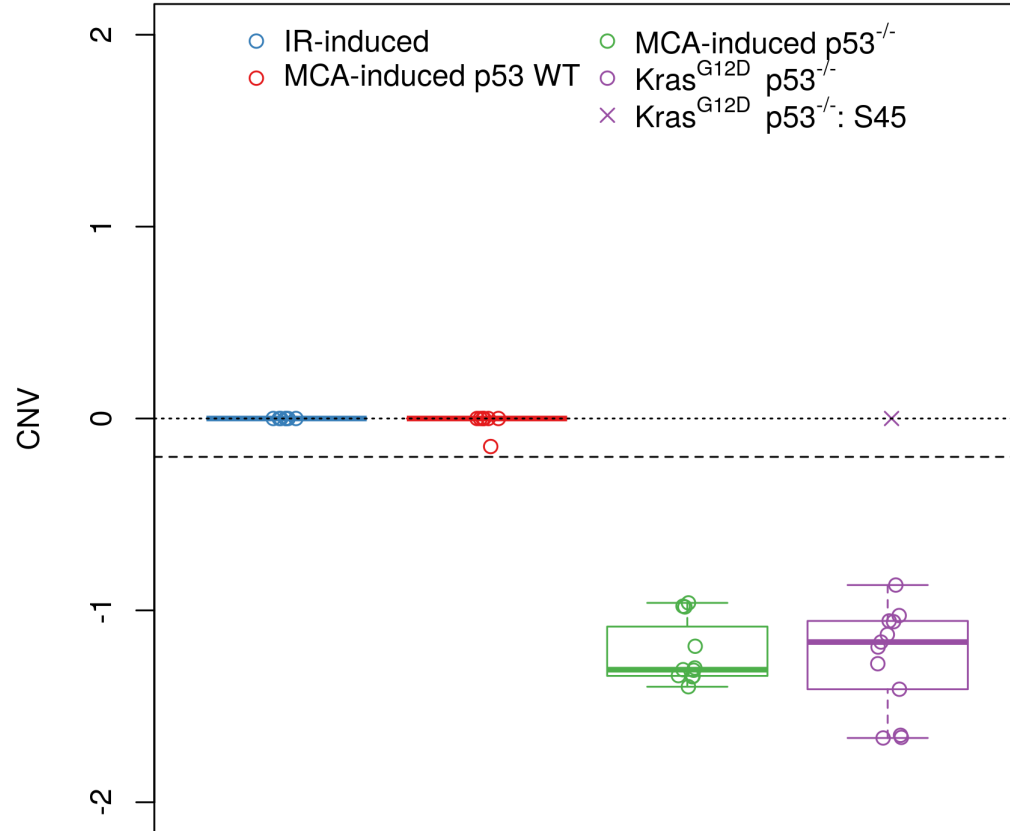

**Figure S8.** Copy number variations of the tumor suppressor p53 in sarcomas.
